# Supplementary material
Source: MDPI journal article supplement (https://www.mdpi.com/2073-4395/12/12/2999)
Supplement: s1 [file s1]

**Table S1.** ANOVA outputs of processing physiological parameters.

|                                     | Df | Sum Sq  | Mean Sq | F value | Pr(>F)   | Significance |
|-------------------------------------|----|---------|---------|---------|----------|--------------|
| Plant's height, cm                  |    |         |         |         |          |              |
| Soil (S)                            | 1  | 406     | 406     | 38.2    | 6.17E-08 | < 0.001      |
| Treatment (T)                       | 2  | 200     | 100     | 9.40    | 2.80E-04 | < 0.001      |
| Time                                | 4  | 4 219   | 1 055   | 99.1    | 9.90E-26 | < 0.001      |
| S × T                               | 2  | 220     | 110     | 10.4    | 1.37E-04 | < 0.001      |
| S × Time                            | 4  | 444     | 111     | 10.4    | 1.78E-06 | < 0.001      |
| T × Time                            | 8  | 25.2    | 3.14    | 0.30    | 0.96     | -            |
| S × T × Time                        | 8  | 112     | 14.0    | 1.32    | 0.25     | -            |
| Tillers quantity                    |    |         |         |         |          |              |
| S                                   | 1  | 3.40    | 3.40    | 1.57    | 0.21     | -            |
| T                                   | 2  | 37.3    | 18.6    | 8.61    | 5.15E-04 | < 0.001      |
| Time                                | 4  | 413     | 103     | 47.7    | 5.45E-18 | < 0.001      |
| S × T                               | 2  | 32.1    | 16.1    | 7.42    | 1.32E-03 | < 0.01       |
| S × Time                            | 4  | 14.5    | 3.62    | 1.67    | 0.17     | -            |
| T × Time                            | 8  | 57.1    | 7.14    | 3.30    | 3.48E-03 | < 0.01       |
| S × T × Time                        | 8  | 13.6    | 1.71    | 0.79    | 0.61     | -            |
| Stems diameter, cm                  |    |         |         |         |          |              |
| S                                   | 1  | 0.02    | 0.02    | 0.87    | 0.35     | -            |
| T                                   | 2  | 0.50    | 0.25    | 9.29    | 3.05E-04 | < 0.001      |
| Time                                | 4  | 3.02    | 0.76    | 28.3    | 3.29E-13 | < 0.001      |
| S × T                               | 2  | 0.44    | 0.22    | 8.30    | 6.57E-04 | < 0.001      |
| S × Time                            | 4  | 0.06    | 0.01    | 0.55    | 0.70     | -            |
| T × Time                            | 8  | 0.07    | 0.01    | 0.31    | 0.96     | -            |
| S × T × Time                        | 8  | 0.05    | 0.01    | 0.25    | 0.98     | -            |
| Plant's total area, cm <sup>2</sup> |    |         |         |         |          |              |
| S                                   | 1  | 21 574  | 21 574  | 28.8    | 1.38E-06 | < 0.001      |
| T                                   | 2  | 189 486 | 94 743  | 126     | 3.13E-22 | < 0.001      |
| Time                                | 4  | 713 689 | 178 422 | 238     | 4.61E-36 | < 0.001      |
| S × T                               | 2  | 10 061  | 5 030   | 6.70    | 2.35E-03 | < 0.01       |
| S × Time                            | 4  | 114 924 | 28 731  | 38.3    | 6.84E-16 | < 0.001      |
| T × Time                            | 8  | 40 650  | 5 081   | 6.77    | 2.69E-06 | < 0.001      |
| S × T × Time                        | 8  | 32 719  | 4 090   | 5.45    | 3.55E-05 | < 0.001      |
| Dry weight, g                       |    |         |         |         |          |              |
| S                                   | 1  | 1.42    | 1.42    | 2.85    | 0.10     | -            |
| T                                   | 2  | 74.2    | 37.1    | 74.5    | 5.08E-11 | < 0.001      |
| Plant parts (PP)                    | 1  | 84.5    | 84.5    | 170     | 2.25E-12 | < 0.001      |
| S × T                               | 2  | 46.3    | 23.1    | 46.5    | 5.59E-09 | < 0.001      |
| S × PP                              | 1  | 0.04    | 0.04    | 0.09    | 0.77     | -            |
| T × PP                              | 2  | 1.04    | 0.52    | 1.05    | 0.37     | -            |
| S × T × PP                          | 2  | 14.0    | 6.99    | 14.0    | 9.17E-05 | < 0.001      |
| Fv'/Fm'                             |    |         |         |         |          |              |
| S                                   | 1  | 0.004   | 0.004   | 37.9    | 2.30E-06 | < 0.001      |
| T                                   | 2  | 0.001   | 0.001   | 6.03    | 7.57E-03 | < 0.01       |
| Time                                | 1  | 2.763   | 2.763   | 24 309  | 1.37E-37 | < 0.001      |

|              |   |       |       |      |          |         |
|--------------|---|-------|-------|------|----------|---------|
| S × T        | 2 | 0.005 | 0.002 | 21.3 | 4.77E-06 | < 0.001 |
| S × Time     | 1 | 0.003 | 0.003 | 27.4 | 2.28E-05 | < 0.001 |
| T × Time     | 2 | 0.001 | 0.001 | 4.74 | 1.85E-02 | < 0.05  |
| S × T × Time | 2 | 0.007 | 0.004 | 32.7 | 1.42E-07 | < 0.001 |

---

**Table S2.** Physiological parameters of *M×g* at the beginning and end of the vegetation season. Different letters within one month indicate a significant difference between the values.

| Time point                          | Control               | Chomutov<br>Charkor   | Kametur               | Control               | Všebořice<br>Charkor  | Kametur               | S       | <i>p</i> -value<br>T | S × T   |
|-------------------------------------|-----------------------|-----------------------|-----------------------|-----------------------|-----------------------|-----------------------|---------|----------------------|---------|
| Plant's height, cm                  |                       |                       |                       |                       |                       |                       |         |                      |         |
| June                                | 20.3 ± 3.51 <b>a</b>  | 18.3 ± 1.25 <b>ab</b> | 13.5 ± 1.50 <b>b</b>  | 14.8 ± 1.25 <b>ab</b> | 7.00 ± 1.00 <b>c</b>  | 16.8 ± 2.75 <b>ab</b> | < 0.001 | < 0.01               | < 0.001 |
| October                             | 34.4 ± 2.90           | 29.4 ± 6.76           | 27.5 ± 4.54           | 38.3 ± 2.42           | 37.6 ± 2.62           | 37.7 ± 3.10           | < 0.01  | 0.28                 | 0.42    |
| Tillers quantity                    |                       |                       |                       |                       |                       |                       |         |                      |         |
| June                                | 1.50 ± 0.50 <b>b</b>  | 2.00 ± 1.00 <b>ab</b> | 3.67 ± 0.58 <b>a</b>  | 3.50 ± 0.50 <b>a</b>  | 3.50 ± 0.50 <b>a</b>  | 3.67 ± 0.58 <b>a</b>  | < 0.01  | < 0.05               | < 0.05  |
| October                             | 8.50 ± 2.50 <b>ab</b> | 10.5 ± 1.50 <b>ab</b> | 8.30 ± 0.58 <b>ab</b> | 11.5 ± 0.50 <b>a</b>  | 8.00 ± 1.73 <b>ab</b> | 6.50 ± 1.80 <b>b</b>  | 0.57    | < 0.05               | < 0.05  |
| Stems diameter, cm                  |                       |                       |                       |                       |                       |                       |         |                      |         |
| June                                | 1.03 ± 0.12           | 0.87 ± 0.12           | 1.10 ± 0.10           | 0.90 ± 0.10           | 0.88 ± 0.16           | 0.90 ± 0.10           | 0.08    | 0.20                 | 0.30    |
| October                             | 1.67 ± 0.38           | 1.20 ± 0.10           | 1.50 ± 0.10           | 1.50 ± 0.36           | 1.43 ± 0.06           | 1.57 ± 0.06           | 0.68    | 0.13                 | 0.33    |
| Plant's total area, cm <sup>2</sup> |                       |                       |                       |                       |                       |                       |         |                      |         |
| June                                | 225 ± 11.7            | 208 ± 18.1            | 225 ± 9.11            | 151 ± 17.9            | 107 ± 34.2            | 141 ± 8.24            | < 0.001 | < 0.05               | 0.46    |
| October                             | 425 ± 11.9 <b>bc</b>  | 270 ± 68.6 <b>d</b>   | 365 ± 15.2 <b>c</b>   | 487 ± 14.3 <b>ab</b>  | 354 ± 9.52 <b>c</b>   | 548 ± 12.8 <b>a</b>   | < 0.001 | < 0.001              | < 0.05  |

**Table S3.** TEs concentrations (in mg kg<sup>-1</sup>) accumulated in *M×g* leaves and stems after the vegetation season. Different letters within one month indicate a significant difference between the values.

| S               | T          | PP     | Mg                      | Al                    | Si                      | P                     | S                       | K                        |
|-----------------|------------|--------|-------------------------|-----------------------|-------------------------|-----------------------|-------------------------|--------------------------|
| Chomutov        | Control    | Leaves | 2 137 ± 132 <b>b</b>    | 757 ± 29.4 <b>b</b>   | 25 969 ± 2 472 <b>c</b> | 302 ± 22.6 <b>cd</b>  | 537 ± 47.4 <b>de</b>    | 4 638 ± 539 <b>g</b>     |
|                 |            | Stems  | 2 712 ± 160 <b>a</b>    | -                     | 10 235 ± 96.2 <b>d</b>  | 472 ± 109 <b>ab</b>   | 705 ± 44.4 <b>bcd</b>   | 7 793 ± 199 <b>ef</b>    |
|                 | Charkor    | Leaves | 1 869 ± 157 <b>b</b>    | 784 ± 53.1 <b>b</b>   | 35 525 ± 2 166 <b>b</b> | 279 ± 27.5 <b>cd</b>  | 566 ± 44.4 <b>cde</b>   | 7 112 ± 364 <b>efg</b>   |
|                 |            | Stems  | 1 846 ± 7.29 <b>b</b>   | -                     | 9 206 ± 515 <b>d</b>    | 472 ± 136 <b>ab</b>   | 716 ± 47.0 <b>bc</b>    | 12 559 ± 2 181 <b>cd</b> |
|                 | Kametur    | Leaves | 2 487 ± 156 <b>a</b>    | 1 052 ± 74.8 <b>a</b> | 40 050 ± 2 034 <b>a</b> | 466 ± 9.52 <b>ab</b>  | 601 ± 57.7 <b>cde</b>   | 5 563 ± 123 <b>fg</b>    |
|                 |            | Stems  | 1 975 ± 72.4 <b>b</b>   | -                     | 10 709 ± 885 <b>d</b>   | 507 ± 13.8 <b>a</b>   | 782 ± 48.1 <b>ab</b>    | 7 640 ± 552 <b>ef</b>    |
| Všebořice       | Control    | Leaves | 1 279 ± 98.0 <b>cd</b>  | 683 ± 77.9 <b>bc</b>  | 23 468 ± 1 839 <b>c</b> | 210 ± 9.80 <b>d</b>   | 458 ± 49.9 <b>e</b>     | 9 893 ± 1 152 <b>de</b>  |
|                 |            | Stems  | 1 514 ± 54.4 <b>c</b>   | -                     | 7 763 ± 924 <b>d</b>    | 334 ± 8.74 <b>bcd</b> | 932 ± 59.2 <b>a</b>     | 21 293 ± 1 373 <b>b</b>  |
|                 | Charkor    | Leaves | 1 261 ± 89.7 <b>cd</b>  | 589 ± 55.3 <b>c</b>   | 22 073 ± 202 <b>c</b>   | 212 ± 8.11 <b>d</b>   | 465 ± 28.4 <b>e</b>     | 7 318 ± 134 <b>efg</b>   |
|                 |            | Stems  | 1 103 ± 76.4 <b>d</b>   | -                     | 8 717 ± 389 <b>d</b>    | 338 ± 35.5 <b>bcd</b> | 554 ± 139 <b>cde</b>    | 15 215 ± 1 337 <b>c</b>  |
|                 | Kametur    | Leaves | 1 090 ± 9.81 <b>d</b>   | 743 ± 42.5 <b>bc</b>  | 22 010 ± 2 436 <b>c</b> | 192 ± 8.70 <b>d</b>   | 459 ± 4.81 <b>e</b>     | 8 447 ± 775 <b>ef</b>    |
|                 |            | Stems  | 1 211 ± 68.3 <b>cd</b>  | -                     | 7 717 ± 119 <b>d</b>    | 302 ± 22.6 <b>abc</b> | 721 ± 27.6 <b>bc</b>    | 24 266 ± 805 <b>a</b>    |
| <i>p</i> -value | S          |        | < 0.001                 | < 0.001               | < 0.001                 | < 0.001               | < 0.05                  | < 0.001                  |
|                 | T          |        | < 0.001                 | < 0.001               | < 0.001                 | < 0.01                | < 0.01                  | <b>0.09</b>              |
|                 | PP         |        | <b>0.26</b>             | -                     | < 0.001                 | < 0.001               | < 0.001                 | < 0.001                  |
|                 | S × T      |        | < 0.001                 | < 0.05                | < 0.001                 | <b>0.17</b>           | < 0.001                 | < 0.001                  |
|                 | S × PP     |        | <b>0.45</b>             | -                     | < 0.001                 | <b>0.51</b>           | < 0.01                  | < 0.001                  |
|                 | T × PP     |        | < 0.001                 | -                     | < 0.001                 | <b>0.84</b>           | < 0.01                  | < 0.05                   |
|                 | S × T × PP |        | < 0.001                 | -                     | < 0.001                 | < 0.05                | < 0.01                  | < 0.001                  |
| S               | T          | PP     | Ca                      | Ti                    | Mn                      | Fe                    | Cu                      | Zn                       |
| Chomutov        | Control    | Leaves | 8 354 ± 770 <b>b</b>    | 87.6 ± 4.75 <b>cd</b> | 169 ± 13.7 <b>c</b>     | 524 ± 25.0 <b>b</b>   | 3.26 ± 0.26 <b>bc</b>   | 45.5 ± 0.16 <b>de</b>    |
|                 |            | Stems  | 3 467 ± 258 <b>ef</b>   | 23.5 ± 1.65 <b>e</b>  | 114 ± 8.85              | 109 ± 10.7 <b>d</b>   | 2.30 ± 0.01 <b>ef</b>   | 127 ± 6.32 <b>b</b>      |
|                 | Charkor    | Leaves | 9 663 ± 341 <b>ab</b>   | 72.2 ± 4.02 <b>d</b>  | 175 ± 20.9 <b>c</b>     | 437 ± 19.6 <b>c</b>   | 3.41 ± 0.20 <b>b</b>    | 50.5 ± 3.05 <b>d</b>     |
|                 |            | Stems  | 3 737 ± 17.3 <b>def</b> | 13.1 ± 2.04 <b>e</b>  | 107 ± 7.40              | 45.5 ± 3.70 <b>d</b>  | 2.47 ± 0.05 <b>def</b>  | 125 ± 8.31 <b>b</b>      |
|                 | Kametur    | Leaves | 10 459 ± 1 082 <b>a</b> | 139 ± 14.0 <b>a</b>   | 195 ± 27.5 <b>c</b>     | 777 ± 75.9 <b>a</b>   | 4.26 ± 0.24 <b>a</b>    | 43.2 ± 0.89 <b>de</b>    |
|                 |            | Stems  | 3 128 ± 26.7 <b>f</b>   | 18.0 ± 0.74 <b>e</b>  | 162 ± 8.36              | 80.0 ± 4.00 <b>d</b>  | 2.54 ± 0.31 <b>def</b>  | 150 ± 8.37 <b>a</b>      |
| Všebořice       | Control    | Leaves | 4 809 ± 464 <b>cde</b>  | 70.4 ± 12.0 <b>d</b>  | 823 ± 60.2 <b>a</b>     | 438 ± 51.7 <b>c</b>   | 3.35 ± 0.27 <b>b</b>    | 29.6 ± 2.89 <b>e</b>     |
|                 |            | Stems  | 1 360 ± 32.5 <b>g</b>   | 18.6 ± 0.52 <b>e</b>  | 762 ± 62.3              | 75.1 ± 1.69 <b>d</b>  | 2.58 ± 0.10 <b>cdef</b> | 138 ± 4.45 <b>ab</b>     |
|                 | Charkor    | Leaves | 5 207 ± 613 <b>c</b>    | 94.5 ± 4.99 <b>bc</b> | 890 ± 58.0 <b>a</b>     | 437 ± 23.0 <b>c</b>   | 2.86 ± 0.33 <b>bcde</b> | 29.5 ± 0.84 <b>e</b>     |
|                 |            | Stems  | 1 632 ± 136 <b>g</b>    | 20.8 ± 1.13 <b>e</b>  | 755 ± 39.6              | 77.4 ± 8.25 <b>d</b>  | 1.91 ± 0.06 <b>f</b>    | 125 ± 13.6 <b>b</b>      |
|                 | Kametur    | Leaves | 5 029 ± 570 <b>cd</b>   | 108 ± 1.75 <b>b</b>   | 753 ± 31.0 <b>b</b>     | 485 ± 3.28 <b>bc</b>  | 3.25 ± 0.33 <b>bc</b>   | 31.3 ± 3.01 <b>e</b>     |
|                 |            | Stems  | 1 475 ± 142 <b>g</b>    | 25.0 ± 2.90 <b>e</b>  | 566 ± 0.64              | 92.2 ± 5.47 <b>d</b>  | 3.04 ± 0.31 <b>bcd</b>  | 101 ± 1.81 <b>c</b>      |
| <i>p</i> -value | S          |        | < 0.001                 | < 0.001               | < 0.001                 | < 0.001               | < 0.05                  | < 0.001                  |
|                 | T          |        | < 0.05                  | < 0.001               | < 0.001                 | < 0.001               | < 0.001                 | <b>0.33</b>              |
|                 | PP         |        | < 0.001                 | < 0.001               | < 0.001                 | < 0.001               | < 0.001                 | < 0.001                  |

|                 |          | S × T      | <b>0.22</b>  | < 0.001    | < 0.001 *   | < 0.001  | < 0.01      | < 0.001     |
|-----------------|----------|------------|--------------|------------|-------------|----------|-------------|-------------|
|                 |          | S × PP     | < 0.001      | < 0.01     | < 0.01      | < 0.001  | < 0.01      | <b>0.36</b> |
|                 |          | T × PP     | < 0.05       | < 0.001    | <b>0.17</b> | < 0.001  | <b>0.86</b> | <b>0.13</b> |
|                 |          | S × T × PP | < 0.05       | < 0.001    | <b>0.05</b> | < 0.001  | < 0.001     | < 0.001     |
| <b>S</b>        | <b>T</b> | <b>PP</b>  | <b>Rb</b>    |            | <b>Sr</b>   |          | <b>Pb</b>   |             |
| Chomutov        | Control  | Leaves     | 6.15 ± 0.09  | <b>bcd</b> | 20.5 ± 0.16 | <b>b</b> | 1.18 ± 0.02 | <b>b</b>    |
|                 |          | Stems      | 8.01 ± 0.57  | <b>bc</b>  | 11.0 ± 0.39 |          | -           |             |
|                 | Charkor  | Leaves     | 6.50 ± 0.030 | <b>bcd</b> | 30.2 ± 1.18 | <b>a</b> | 1.45 ± 0.12 | <b>b</b>    |
|                 |          | Stems      | 9.18 ± 1.36  | <b>b</b>   | 14.5 ± 2.02 |          | -           |             |
|                 | Kametur  | Leaves     | 6.81 ± 0.45  | <b>bcd</b> | 31.5 ± 0.87 | <b>a</b> | 1.83 ± 0.16 | <b>a</b>    |
|                 |          | Stems      | 15.4 ± 2.84  | <b>a</b>   | 15.9 ± 1.86 |          | -           |             |
| Všebořice       | Control  | Leaves     | 5.11 ± 0.03  | <b>bcd</b> | 23.4 ± 2.91 | <b>b</b> | -           |             |
|                 |          | Stems      | 14.2 ± 1.97  | <b>a</b>   | 10.8 ± 1.10 |          | -           |             |
|                 | Charkor  | Leaves     | 4.48 ± 0.38  | <b>d</b>   | 27.3 ± 3.40 | <b>b</b> | -           |             |
|                 |          | Stems      | 6.86 ± 0.75  | <b>bcd</b> | 9.43 ± 0.93 |          | -           |             |
|                 | Kametur  | Leaves     | 6.26 ± 0.39  | <b>bcd</b> | 26.4 ± 2.72 | <b>b</b> | -           |             |
|                 |          | Stems      | 16.4 ± 0.55  | <b>a</b>   | 10.4 ± 0.46 |          | -           |             |
| <i>p</i> -value |          | S          | < 0.001      |            | < 0.001     |          | -           |             |
|                 |          | T          | < 0.001      |            | < 0.001     |          | < 0.01      |             |
|                 |          | PP         | < 0.001      |            | < 0.001     |          | -           |             |
|                 |          | S × T      | < 0.001      |            | < 0.001 *   |          | -           |             |
|                 |          | S × PP     | < 0.01       |            | 0.14        |          | -           |             |
|                 |          | T × PP     | < 0.001      |            | < 0.01      |          | -           |             |
|                 |          | S × T × PP | < 0.01       |            | 0.64        |          | -           |             |

Note: S – soil; T – treatment; PP – plant's part.

**Table S4.** BCF values for TEs accumulated in *M*×*g* leaves and stems after the vegetation season. Different letters within one month indicate a significant difference between the values.

| S               | T          | PP     | Mg                      | Al                       | Si                     | P                      | S                        | K                      |
|-----------------|------------|--------|-------------------------|--------------------------|------------------------|------------------------|--------------------------|------------------------|
| Chomutov        | Control    | Leaves | 0.16 ± 0.01 <b>b</b>    | 0.008 ± 0 <b>b</b>       | 0.085 ± 0.008 <b>b</b> | 0.17 ± 0.01 <b>cd</b>  | 1.80 ± 0.16              | 0.15 ± 0.02 <b>g</b>   |
|                 |            | Stems  | 0.20 ± 0.01 <b>a</b>    | -                        | 0.033 ± 0 <b>c</b>     | 0.27 ± 0.06 <b>a</b>   | 2.36 ± 0.15              | 0.26 ± 0.01 <b>fg</b>  |
|                 | Charkor    | Leaves | 0.14 ± 0.01 <b>bcd</b>  | 0.008 ± 0.001 <b>b</b>   | 0.116 ± 0.007 <b>a</b> | 0.16 ± 0.02 <b>cd</b>  | 1.90 ± 0.15              | 0.23 ± 0.01 <b>g</b>   |
|                 |            | Stems  | 0.14 ± 0.001 <b>bcd</b> | -                        | 0.030 ± 0.002 <b>c</b> | 0.27 ± 0.08 <b>a</b>   | 2.40 ± 0.16              | 0.41 ± 0.07 <b>ef</b>  |
|                 | Kametur    | Leaves | 0.19 ± 0.01 <b>a</b>    | 0.011 ± 0.001 <b>a</b>   | 0.130 ± 0.007 <b>a</b> | 0.26 ± 0.01 <b>ab</b>  | 2.02 ± 0.19              | 0.18 ± 0.004 <b>g</b>  |
|                 |            | Stems  | 0.15 ± 0.01 <b>bc</b>   | -                        | 0.035 ± 0.003 <b>c</b> | 0.28 ± 0.01 <b>a</b>   | 2.62 ± 0.16              | 0.25 ± 0.02 <b>g</b>   |
| Všebořice       | Control    | Leaves | 0.12 ± 0.01 <b>cde</b>  | 0.006 ± 0.001 <b>c</b>   | 0.085 ± 0.007 <b>b</b> | 0.11 ± 0.01 <b>d</b>   | 0.33 ± 0.04              | 0.67 ± 0.08 <b>d</b>   |
|                 |            | Stems  | 0.15 ± 0.01 <b>bc</b>   | -                        | 0.028 ± 0.003 <b>c</b> | 0.17 ± 0.01 <b>cd</b>  | 0.67 ± 0.04              | 1.44 ± 0.09 <b>b</b>   |
|                 | Charkor    | Leaves | 0.12 ± 0.01 <b>de</b>   | 0.005 ± 0 <b>c</b>       | 0.080 ± 0.001 <b>b</b> | 0.11 ± 0.004 <b>d</b>  | 0.34 ± 0.02              | 0.49 ± 0.01 <b>e</b>   |
|                 |            | Stems  | 0.11 ± 0.01 <b>e</b>    | -                        | 0.032 ± 0.001 <b>c</b> | 0.17 ± 0.02 <b>bcd</b> | 0.40 ± 0.10              | 1.03 ± 0.09 <b>c</b>   |
|                 | Kametur    | Leaves | 0.11 ± 0.001 <b>e</b>   | 0.006 ± 0 <b>c</b>       | 0.080 ± 0.009 <b>b</b> | 0.10 ± 0.004 <b>d</b>  | 0.33 ± 0.003             | 0.57 ± 0.05 <b>de</b>  |
|                 |            | Stems  | 0.12 ± 0.01 <b>de</b>   | -                        | 0.028 ± 0 <b>c</b>     | 0.22 ± 0.01 <b>abc</b> | 0.52 ± 0.02              | 1.64 ± 0.05 <b>a</b>   |
| <i>p</i> -value | S          |        | < 0.001                 | < 0.001                  | < 0.001                | < 0.001                | < 0.001                  | < 0.001                |
|                 | T          |        | < 0.001                 | < 0.001                  | < 0.001                | < 0.01                 | <b>0.07</b>              | < 0.001                |
|                 | PP         |        | <b>0.20</b>             | -                        | < 0.001                | < 0.001                | < 0.001                  | < 0.001                |
|                 | S × T      |        | < 0.001                 | < 0.01                   | < 0.001                | <b>0.15</b>            | < 0.05                   | < 0.001                |
|                 | S × PP     |        | <b>0.34</b>             | -                        | < 0.001                | <b>0.75</b>            | < 0.001                  | < 0.001                |
|                 | T × PP     |        | < 0.001                 | -                        | < 0.001                | <b>0.79</b>            | <b>0.23</b>              | < 0.001                |
|                 | S × T × PP |        | < 0.001                 | -                        | < 0.001                | < 0.05                 | <b>0.48</b>              | < 0.001                |
| S               | T          | PP     | Ca                      | Ti                       | Mn                     | Fe                     | Cu                       | Zn                     |
| Chomutov        | Control    | Leaves | 1.18 ± 0.11 <b>b</b>    | 0.012 ± 0.001 <b>b</b>   | 0.11 ± 0.01            | 0.010 ± 0 <b>b</b>     | 0.07 ± 0.01 <b>b</b>     | 0.23 ± 0.001 <b>de</b> |
|                 |            | Stems  | 0.49 ± 0.04 <b>c</b>    | 0.003 ± 0 <b>ef</b>      | 0.08 ± 0.01            | 0.002 ± 0 <b>e</b>     | 0.05 ± 0 <b>cde</b>      | 0.64 ± 0.03 <b>b</b>   |
|                 | Charkor    | Leaves | 1.37 ± 0.05 <b>ab</b>   | 0.010 ± 0.001 <b>c</b>   | 0.12 ± 0.01            | 0.009 ± 0 <b>c</b>     | 0.08 ± 0.004 <b>b</b>    | 0.25 ± 0.02 <b>d</b>   |
|                 |            | Stems  | 0.53 ± 0.002 <b>c</b>   | 0.002 ± 0 <b>fg</b>      | 0.07 ± 0.01            | 0.001 ± 0 <b>e</b>     | 0.06 ± 0.001 <b>cd</b>   | 0.63 ± 0.04 <b>b</b>   |
|                 | Kametur    | Leaves | 1.48 ± 0.15 <b>a</b>    | 0.019 ± 0.002 <b>a</b>   | 0.13 ± 0.02            | 0.015 ± 0.002 <b>a</b> | 0.10 ± 0.01 <b>a</b>     | 0.22 ± 0.004 <b>de</b> |
|                 |            | Stems  | 0.44 ± 0.004 <b>c</b>   | 0.002 ± 0 <b>fg</b>      | 0.11 ± 0.01            | 0.002 ± 0 <b>e</b>     | 0.06 ± 0.01 <b>c</b>     | 0.75 ± 0.04 <b>a</b>   |
| Všebořice       | Control    | Leaves | 0.56 ± 0.05 <b>c</b>    | 0.003 ± 0.001 <b>def</b> | 1.51 ± 0.11            | 0.007 ± 0.001 <b>d</b> | 0.05 ± 0.004 <b>cdef</b> | 0.15 ± 0.01 <b>e</b>   |
|                 |            | Stems  | 0.16 ± 0.004 <b>d</b>   | 0.001 ± 0 <b>g</b>       | 1.40 ± 0.11            | 0.001 ± 0 <b>e</b>     | 0.04 ± 0.001 <b>fg</b>   | 0.69 ± 0.02 <b>ab</b>  |
|                 | Charkor    | Leaves | 0.61 ± 0.07 <b>c</b>    | 0.005 ± 0 <b>de</b>      | 1.63 ± 0.11            | 0.007 ± 0 <b>d</b>     | 0.04 ± 0.01 <b>ef</b>    | 0.15 ± 0.004 <b>e</b>  |
|                 |            | Stems  | 0.19 ± 0.02 <b>d</b>    | 0.001 ± 0 <b>g</b>       | 1.38 ± 0.07            | 0.001 ± 0 <b>e</b>     | 0.03 ± 0.001 <b>g</b>    | 0.62 ± 0.07 <b>b</b>   |
|                 | Kametur    | Leaves | 0.59 ± 0.07 <b>c</b>    | 0.005 ± 0 <b>d</b>       | 1.38 ± 0.06            | 0.008 ± 0 <b>cd</b>    | 0.05 ± 0.01 <b>cdef</b>  | 0.16 ± 0.02 <b>e</b>   |
|                 |            | Stems  | 0.17 ± 0.02 <b>d</b>    | 0.001 ± 0 <b>g</b>       | 1.04 ± 0.001           | 0.001 ± 0 <b>e</b>     | 0.04 ± 0.004 <b>def</b>  | 0.50 ± 0.01 <b>c</b>   |
| <i>p</i> -value | S          |        | < 0.001                 | < 0.001                  | < 0.001                | < 0.001                | < 0.001                  | < 0.001                |
|                 | T          |        | < 0.05                  | < 0.001                  | < 0.001                | < 0.001                | < 0.001                  | <b>0.34</b>            |
|                 | PP         |        | < 0.001                 | < 0.001                  | < 0.001                | < 0.001                | < 0.001                  | < 0.001                |

|                 |          | S × T      | <b>0.16</b>            | < 0.001 | < 0.001 *             | < 0.001 | < 0.01                 | < 0.001     |
|-----------------|----------|------------|------------------------|---------|-----------------------|---------|------------------------|-------------|
|                 |          | S × PP     | < 0.001                | < 0.001 | < 0.001               | < 0.001 | < 0.001                | <b>0.48</b> |
|                 |          | T × PP     | < 0.05                 | < 0.001 | <b>0.11</b>           | < 0.001 | <b>0.39</b>            | <b>0.13</b> |
|                 |          | S × T × PP | < 0.05                 | < 0.001 | <b>0.07</b>           | < 0.001 | < 0.001                | < 0.001     |
| <b>S</b>        | <b>T</b> | <b>PP</b>  | <b>Rb</b>              |         | <b>Sr</b>             |         | <b>Pb</b>              |             |
| Chomutov        | Control  | Leaves     | 0.03 ± 0 <b>d</b>      |         | 0.11 ± 0.001 <b>b</b> |         | 0.010 ± 0 <b>b</b>     |             |
|                 |          | Stems      | 0.04 ± 0.003 <b>cd</b> |         | 0.06 ± 0.002 <b>e</b> |         | -                      |             |
|                 | Charkor  | Leaves     | 0.03 ± 0 <b>d</b>      |         | 0.16 ± 0.01 <b>a</b>  |         | 0.012 ± 0.001 <b>b</b> |             |
|                 |          | Stems      | 0.04 ± 0.01 <b>cd</b>  |         | 0.08 ± 0.01 <b>cd</b> |         | -                      |             |
|                 | Kametur  | Leaves     | 0.03 ± 0.002 <b>d</b>  |         | 0.17 ± 0.01 <b>a</b>  |         | 0.015 ± 0.001 <b>a</b> |             |
|                 |          | Stems      | 0.07 ± 0.01 <b>b</b>   |         | 0.09 ± 0.01 <b>c</b>  |         | -                      |             |
| Všebořice       | Control  | Leaves     | 0.04 ± 0 <b>cd</b>     |         | 0.06 ± 0.01 <b>e</b>  |         | -                      |             |
|                 |          | Stems      | 0.12 ± 0.02 <b>a</b>   |         | 0.03 ± 0.003 <b>f</b> |         | -                      |             |
|                 | Charkor  | Leaves     | 0.04 ± 0.003 <b>cd</b> |         | 0.07 ± 0.01 <b>de</b> |         | -                      |             |
|                 |          | Stems      | 0.06 ± 0.01 <b>bc</b>  |         | 0.02 ± 0.002 <b>f</b> |         | -                      |             |
|                 | Kametur  | Leaves     | 0.05 ± 0.003 <b>bc</b> |         | 0.06 ± 0.01 <b>de</b> |         | -                      |             |
|                 |          | Stems      | 0.13 ± 0.004 <b>a</b>  |         | 0.03 ± 0.001 <b>f</b> |         | -                      |             |
| <i>p</i> -value |          | S          | < 0.001                |         | < 0.001               |         | -                      |             |
|                 |          | T          | < 0.001                |         | < 0.001               |         | < 0.01                 |             |
|                 |          | PP         | < 0.001                |         | < 0.001               |         | -                      |             |
|                 |          | S × T      | < 0.001                |         | < 0.001               |         | -                      |             |
|                 |          | S × PP     | < 0.001                |         | < 0.001               |         | -                      |             |
|                 |          | T × PP     | < 0.001                |         | < 0.001               |         | -                      |             |
|                 |          | S × T × PP | < 0.001                |         | < 0.05                |         | -                      |             |

Note: S – soil; T – treatment; PP – plant's parts.
